# Supplementary material for: A New Synthetic FGF Receptor Antagonist Inhibits Arteriosclerosis in a Mouse Vein Graft Model and Atherosclerosis in Apolipoprotein E-Deficient Mice
Source: PubMed Central journal article supplement (PMC3817113; doi:10.1371/journal.pone.0080027), 2013-11-04

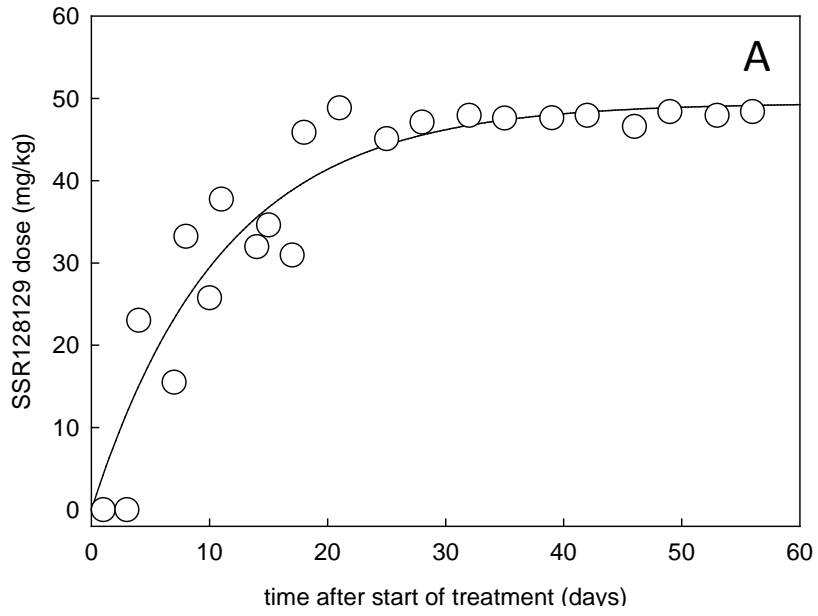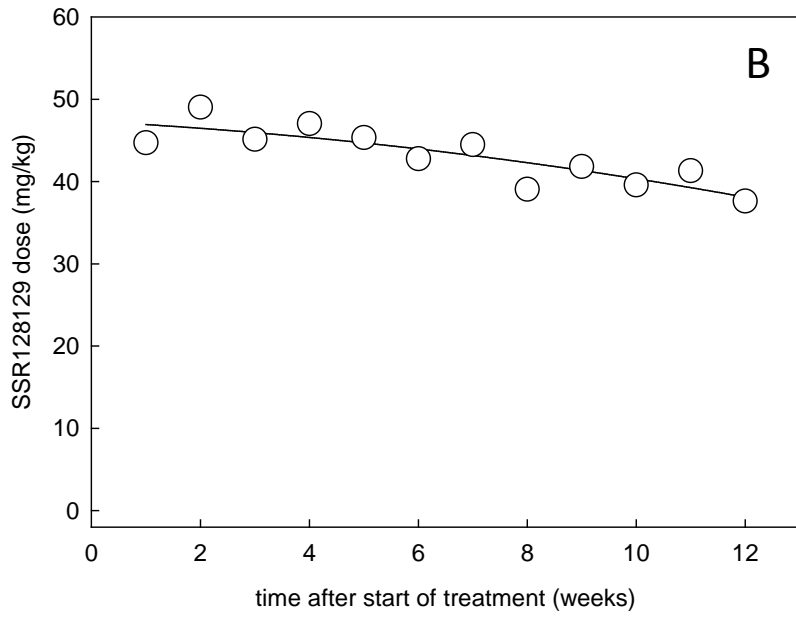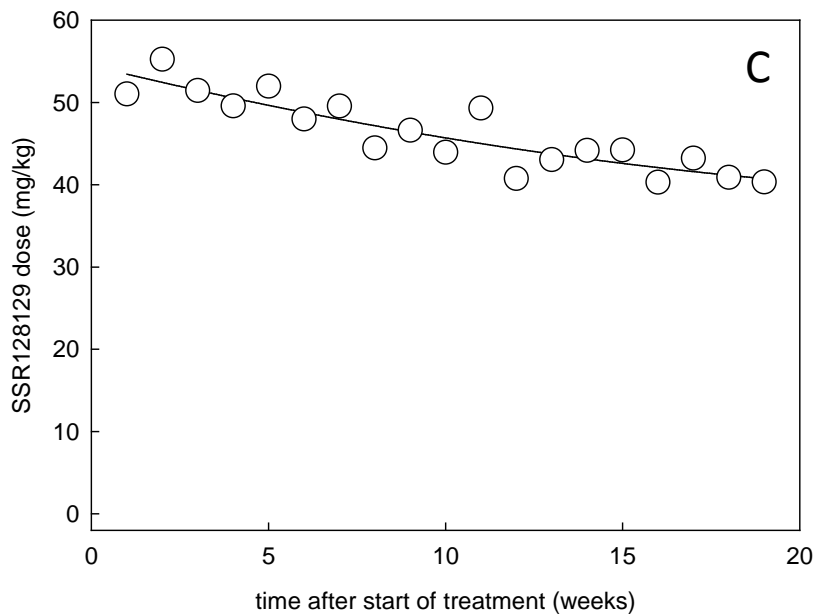

Supplement: pone.0080027.s001.pdf [file pone.0080027.s001.pdf]
